# Supplementary material
Source: PubMed Central journal article supplement (PMC4268257)

(A) Scores by age at baseline

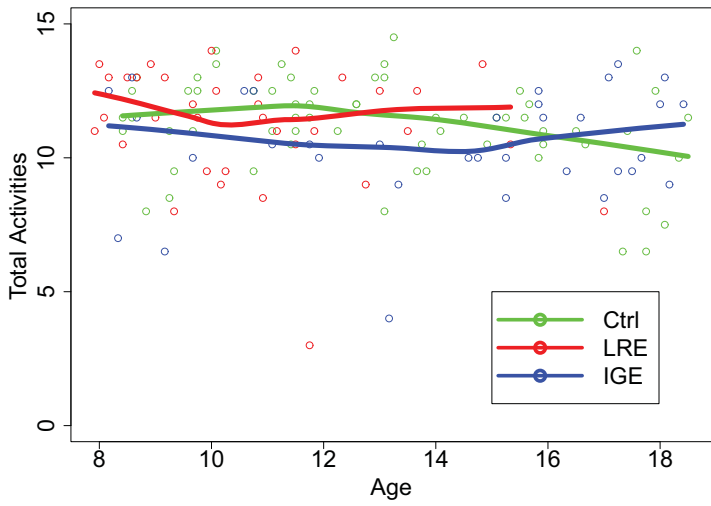

(B) Age-residualized scores by wave and syndrome group

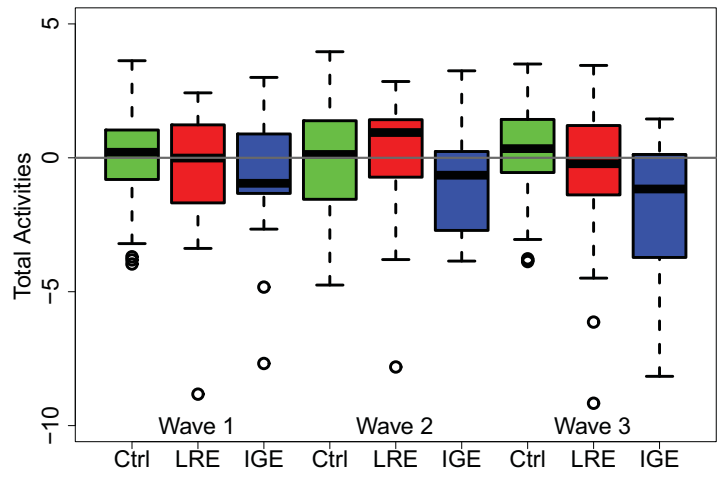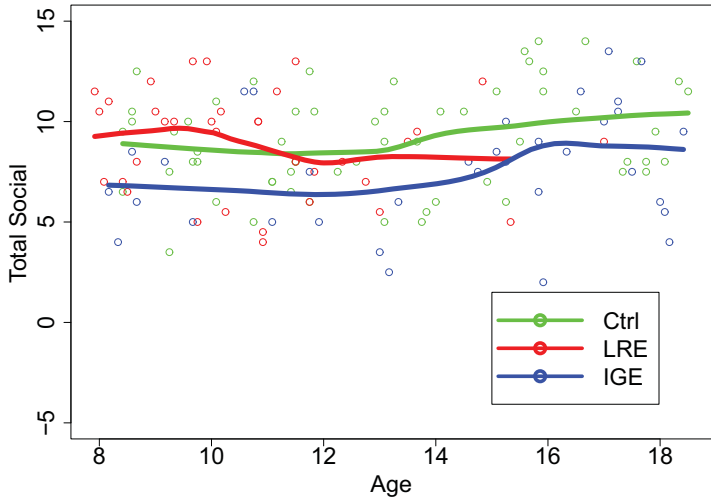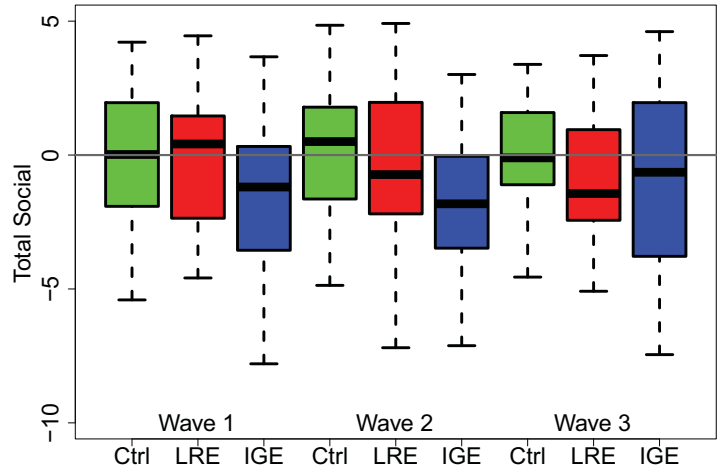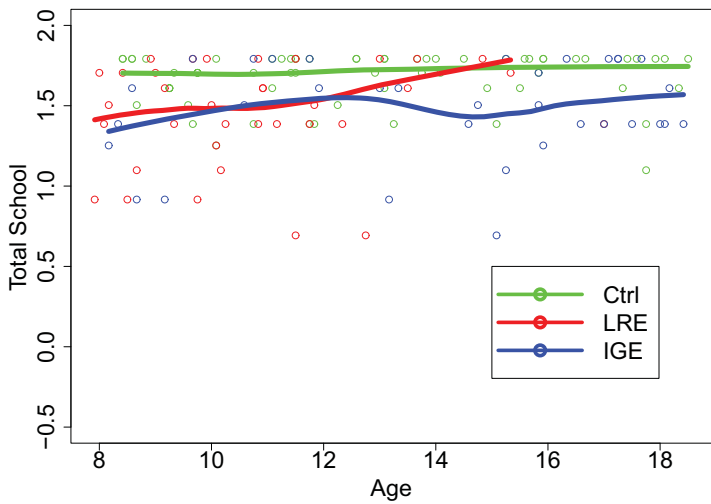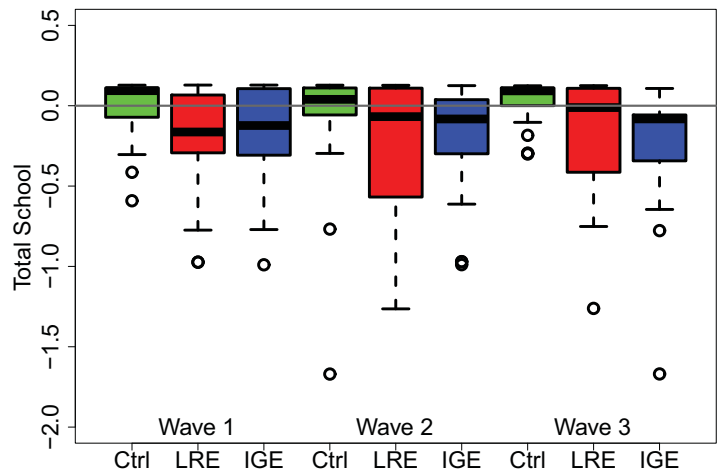

(A) Scores by age at baseline

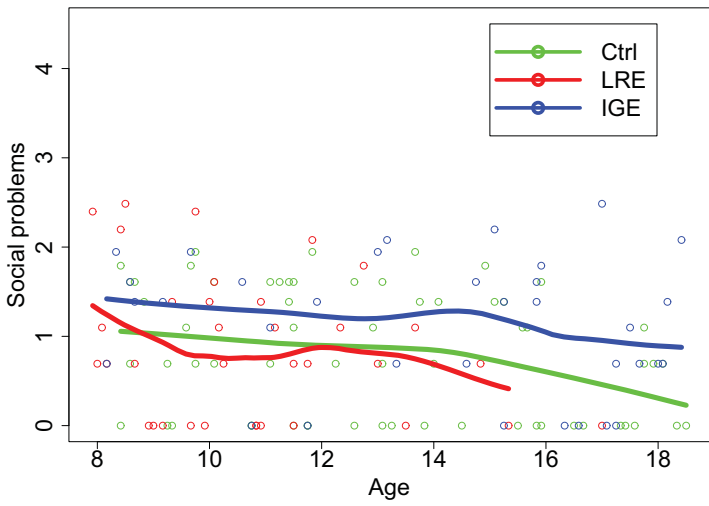

(B) Age-residualized scores by wave and syndrome group

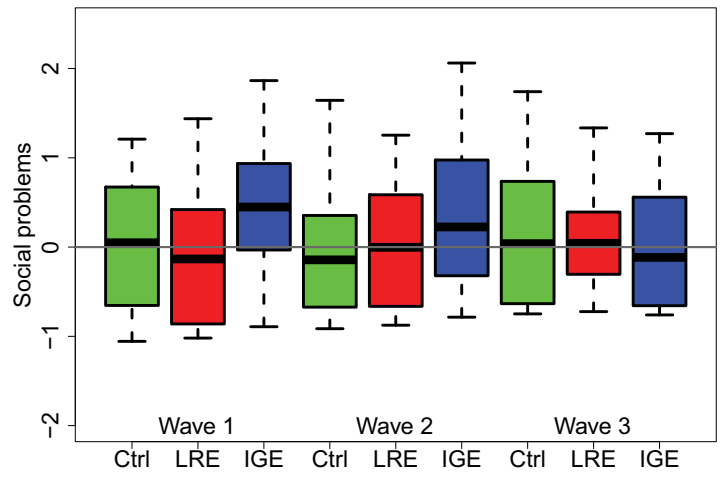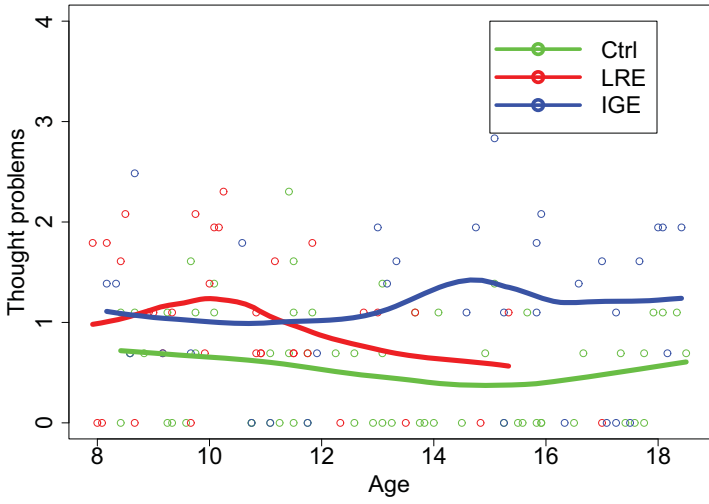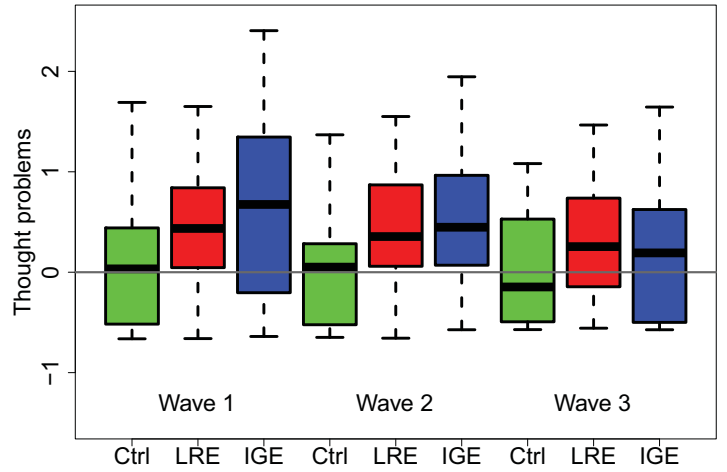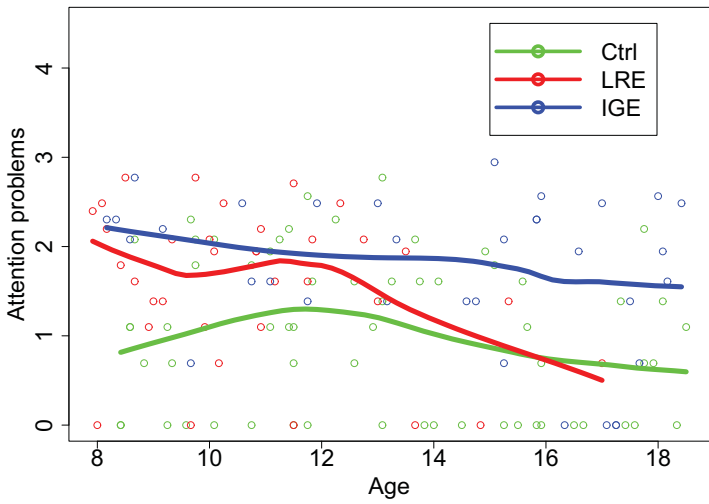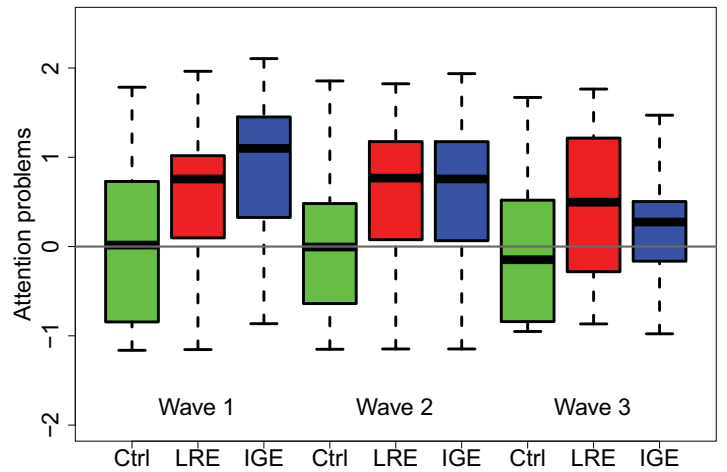

(A) Scores by age at baseline

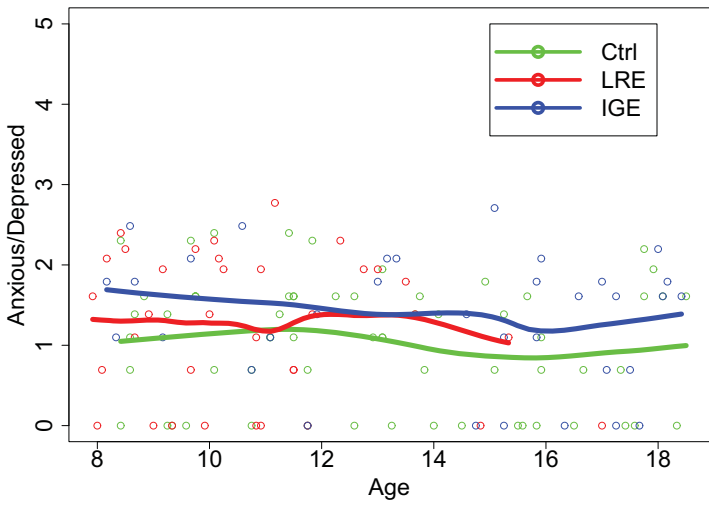

(B) Age-residualized scores by wave and syndrome group

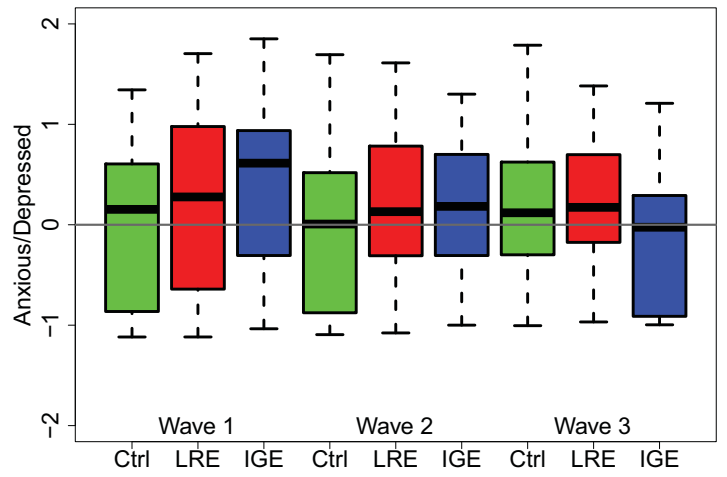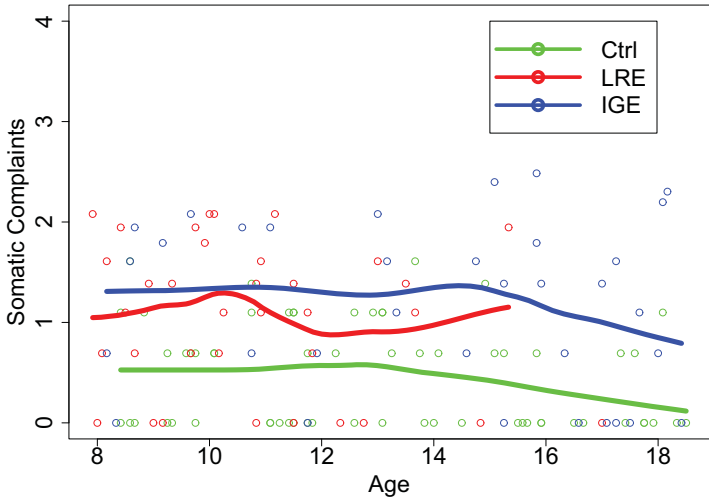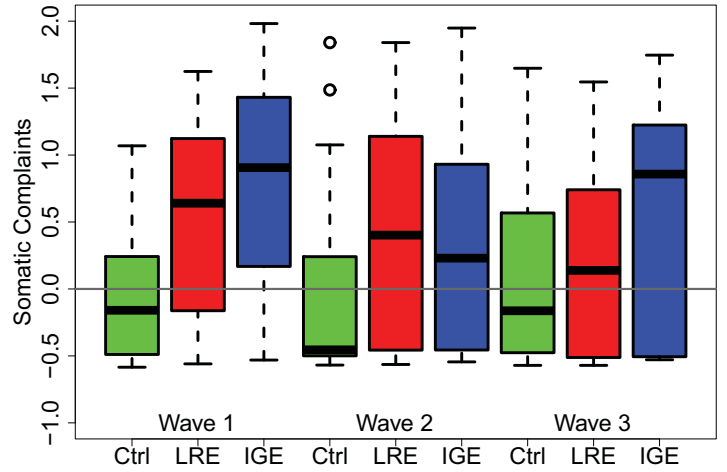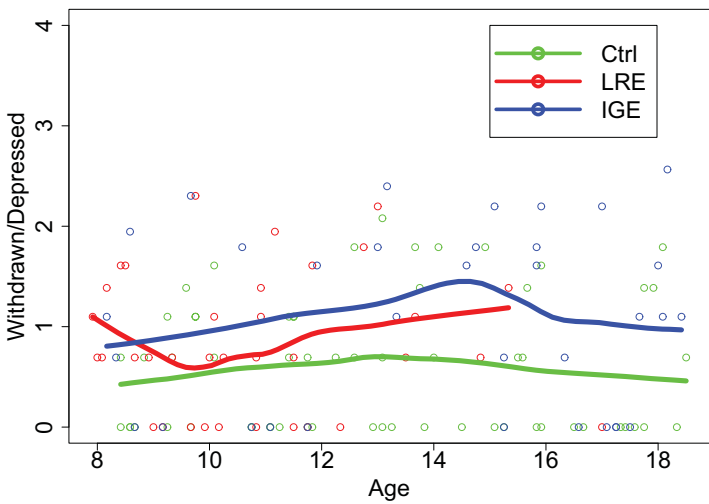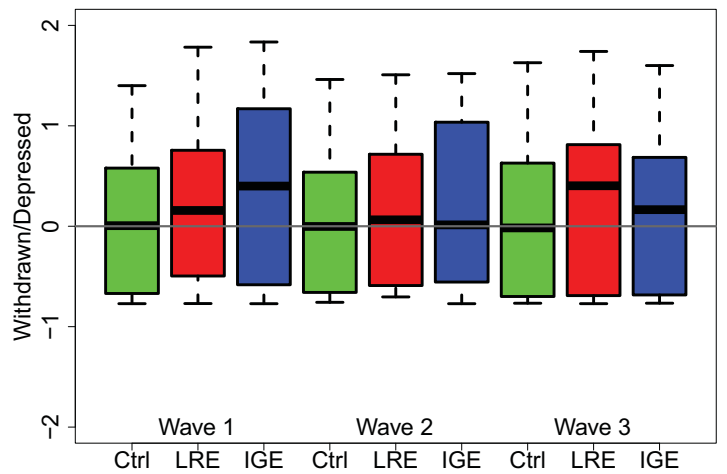

(A) Scores by age at baseline

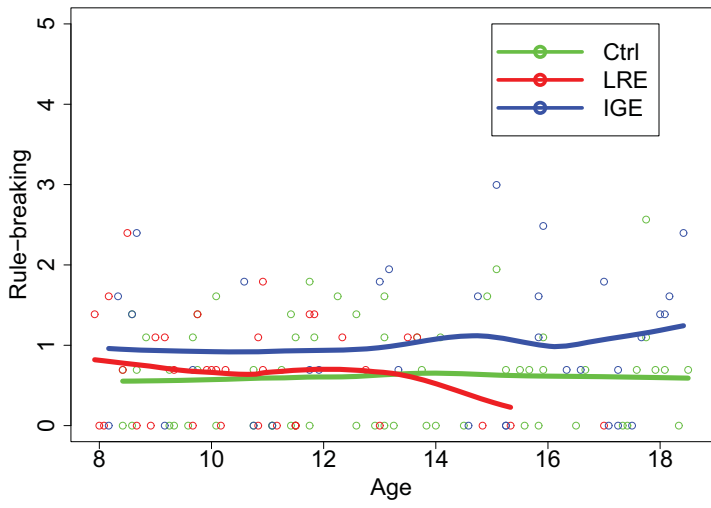

(B) Age-residualized scores by wave and syndrome group

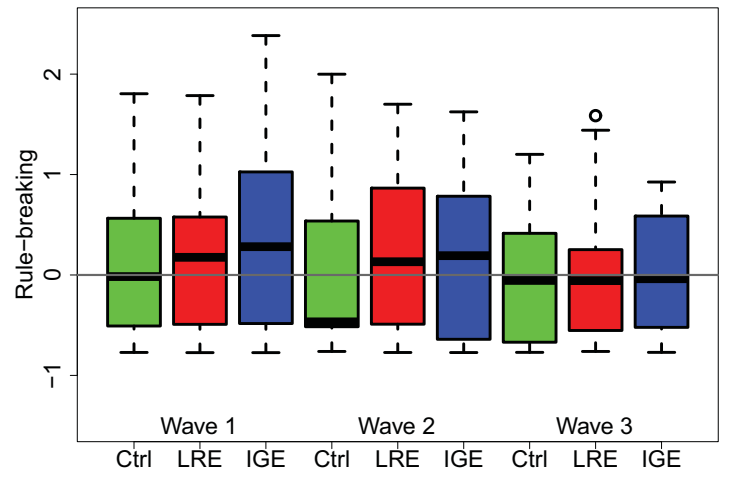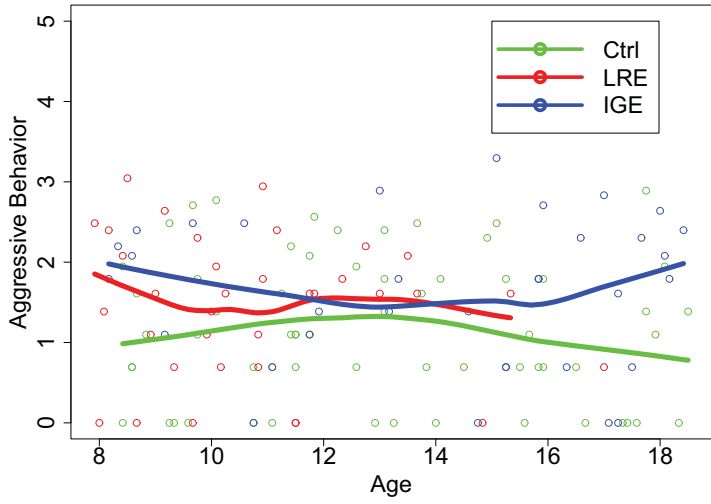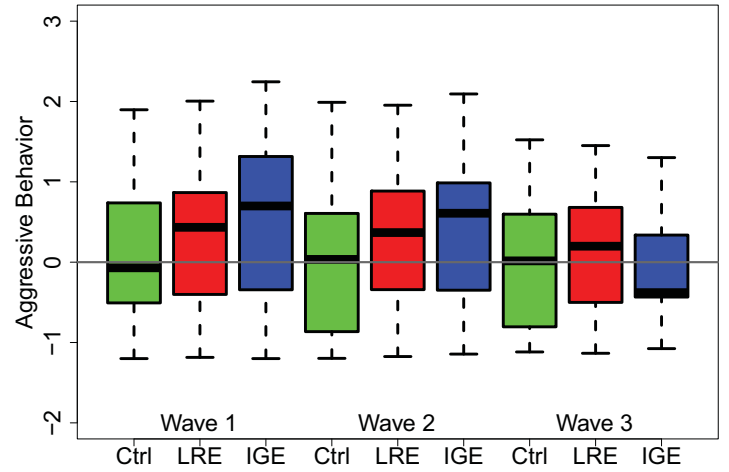

Supplement: NIHMS607558-supplement-Supp_FigureS1.pdf [file NIHMS607558-supplement-Supp_FigureS1.pdf]
